# Supplementary material
Source: PubMed Central journal article supplement (PMC2710827)

## SUPPLEMENTARY MATERIALS

### SUPPLEMENTARY MATERIALS AND METHODS

#### Plasmid construction

pKK117 and pKK129, expression vectors for PrA\*-HA and PrA\*-Ab-HA, respectively. A 2.1-kb fragment was amplified from pES163 (Spear and Ng, 2005) by Vent polymerase-directed PCR (New England Biolabs, Beverly MA) using KKN71 and T3 primers, digested with *XhoI*, and purified. In parallel, a 0.5-kb fragment was amplified from pES163 using primers T7 and 5'-phosphorylated KKN72, digested with *NotI* and purified. These fragments were inserted into pRS316 (Sikorski and Hieter, 1989) to create pKK117. Next, a N308Q mutation was introduced to eliminate the "B" glycosylation site. Using pKK117 as a template, the T3 and N537 primers amplified a 1.9 Kb fragment, digested with *XhoI*, and purified. A 0.7-kb fragment was amplified from pKK117 using primers T7 and N538, digested with *NotI*, and purified. These fragments were inserted into pRS316 to generate pKK129.

pKK247, an expression vector for PrA-HA. The *PEP4* gene was amplified from purified genomic DNA (strain W303a) by PCR with primers KKN274 and KKN275, digested with *ClaI*, and purified. This was used to replace the *ClaI* fragment in pKK117 to create plasmid pKK247.

pKK210, an expression vector for CPY\*-abcd-Δ482-532. First, to create pAS68 carrying CPY\*-ABCD-Δ482-532, A 2.2-kb fragment was amplified from pDN436 (pRS315-CPY\*-ABCD-HA) using T7 and N572 primers, digested with *EagI*, and purified. In parallel, 0.6-kb fragment was amplified from pDN436 using T3 and N573 primers, digested with *SalI*, and purified. These fragments were inserted into pRS316 to generate plasmid pAS78, which expresses CPY\*-

ABCD- $\Delta$ 482-532. Next, a 2.0 kb *SacI*-*BglIII* fragment from pES147 (Spear and Ng, 2005) was used to replace the analogous fragment in pAS78 to produce pKK210.

The following plasmids were generated using site-directed mutagenesis of ERAD substrate clones (Sambrook et al., 1989). Substrate variant names are indicated in parentheses. Primer sequences are listed in *Supplementary Table S3*. All substrate genes are controlled by their endogenous promoters and encode the HA-epitope tag at their C-termini.

pKK156 (PrA\*-Ab- $\Delta$ 37-71). Using the KKN129 oligonucleotide, a segment encoding Glu37 through His71 was deleted from pKK129.

pKK157 (PrA\*-Ab- $\Delta$ 72-106). Using the KKN130 oligonucleotide, a segment encoding Pro72 to Val106 was deleted from pKK129.

pKK158 (PrA\*-Ab- $\Delta$ 110-146). Using the KKN131 oligonucleotide, a segment encoding Thr110 to Thr146 was deleted from pKK129.

pKK159 (PrA\*-Ab- $\Delta$ 147-183). Using the KKN132 oligonucleotide, a segment encoding Glu147 to Ser183 was deleted from pKK129.

pKK160 (PrA\*-Ab- $\Delta$ 184-220). Using the KKN133 oligonucleotide, a segment encoding Glu184 to Gln220 was deleted from pKK129.

pKK161 (PrA\*-Ab- $\Delta$ 221-257). Using the KKN134 oligonucleotide, a segment encoding Asp221 to Gly257 was deleted from pKK129.

pKK162 (PrA\*-Ab- $\Delta$ 258-294). Using the KKN135 oligonucleotide, a segment encoding Asp258 to Asp294 was deleted from pKK129.

pKK163 (PrA\*-Ab- $\Delta$ 295-331). Using the KKN136 oligonucleotide, a segment encoding Thr295 to Arg331 was deleted from pKK129.

pKK164 (PrA\*-Ab-Δ332-368). Using the KKN137 oligonucleotide, a segment encoding Asp332 to Met368 was deleted from pKK129.

pKK216 (CPY\*-abcD-Δ25-117). Using the JBN159 oligonucleotide, a segment encoding Arg25 to Lys117 was deleted from pES147.

pJB113 (CPY\*-abcD-Δ116-206). Using the JBN160 oligonucleotide, a segment encoding Pro116 to Gln206 was deleted from pES147.

pJB114 (CPY-abcD-Δ207-297). Using the JBN161 oligonucleotide, a segment encoding Pro207 to Asn297 was deleted from pES147.

pKK218 (CPY\*-abcD-Δ298-388). Using the JBN162 oligonucleotide, a segment encoding Tyr298 to Asp388 was deleted from pES147.

pKK228 (CPY\*-abcD-Δ389-476). Using the KKN195 oligonucleotide, a segment encoding Tyr389 to Lys476 was deleted from pES147.

pWX2 (PrA\*-Δ155-405). The WXN2 primer was used to delete a segment encoding Lys105 to Ile405 from pKK129.

pWX75 (CPYΔ2). The WXN75 primer was used to delete a segment encoding Ile21 to Asp368 from pKK129.

pWX87 (CPY\*). A 2.8 Kb *NotI* to *XhoI* fragment from pDN436 inserted into pRS316.

pWX92 (CPY-ABCD). This plasmid expresses wild-type CPY containing a C-terminal HA tag. Using primers WXN92 and WXN93, two *BamHI* sites on pDN437 were destroyed while maintaining the native peptide sequence. This was done to facilitate the construction of more complex variants. The gene was sub-cloned into pRS316 vector digested with *NotI* and *XhoI* to generate pWX92.

pWX93 (CPY-abcd) was constructed similarly to pWX92 but the non-glycosylated CPY ORF was used as a template.

pWX141 (CPY- $\Delta$ 112-123). The WXN141 primer was used to delete a segment encoding Lys112 to Pro123 from pWX92.

pWX142 (CPY- $\Delta$ 127-138). The WXN142 primer was used to delete a segment encoding Gln127 to Asp138 from pWX92.

pWX143 (CPY- $\Delta$ 185-196). The WXN143 primer was used to delete a segment encoding Asp185 to Asn196 from pWX92.

pWX144 (CPY- $\Delta$ 201-212). The WXN144 primer was used to delete a segment encoding Val201 to Phe212 from pWX92.

pWX145 (CPY- $\Delta$ 267-278). The WXN145 primer was used to delete a segment encoding Ala267 to Phe278 from pWX92.

pWX146 (CPY- $\Delta$ 282-293). The WXN146 primer was used to delete a segment encoding Ser282 to Leu293 from pWX92.

pWX175 (CPY\*-Abcd- $\Delta$ 112-123). The WXN141 primer was used to delete a segment encoding Lys112 to Pro123 from pES149 and simultaneously restoring the A glycan site.

pWX176 (CPY\*-Abcd- $\Delta$ 127-138). The WXN142 primer was used to delete a segment encoding Gln127 to Asp138 from pES149 and simultaneously restoring the A glycan site.

pWX177 (CPY\*-aBcd- $\Delta$ 185-196). The WXN143 primer was used to delete a segment encoding Asp185 to Asn196 from pES149 and simultaneously restoring the B glycan site.

pWX178 (CPY\*-aBcd- $\Delta$ 201-212). The WXN144 primer was used to delete a segment encoding Val201 to Phe212 from pES149 and simultaneously restoring the B glycan site.

pWX163 (CPY\*-abCd-Δ267-278). The WXN145 primer was used to delete a segment encoding Ala267 to Phe278 from pES149 and simultaneously restoring the C glycan site.

pWX164 (CPY\*-abCd-Δ282-293). The WXN146 primer was used to delete a segment encoding Ser282 to Leu293 from pES149 and simultaneously restoring the C glycan site.

pWX99 (CPY-abcD-Δ25-117). A 1.6 kb fragment was amplified from pKK216 using primers WXN101 and kinased WXN100, digested with *NotI* and purified. In parallel, 1.3 kb fragment was amplified from pKK216 using primers WXN102 and kinased WXN99, digested with *XhoI* and purified. Then these two fragments were inserted into pRS316 digested with *NotI* and *XhoI* to generate pWX99.

pWX100 (CPY-abcD-Δ116-206), pWX101 (CPY-abcD-Δ298-388), pWX102 (CPY-abcD-Δ389-476), pWX103 (CPY-abcD-Δ482-532). These plasmids were constructed as described for pWX99 except that pJB113, pKK218, pKK228, and pKK210 were used as templates, respectively.

pWX94 (CPY-ABCD-C328P) and pWX95 (CPY-abcd-C328P) were generated by site directed mutagenesis with pWX92 and pWX93 as templates, respectively, using the WXN94 primer to convert Cys328 to Pro351.

pWX96 (CPY-ABCD-C351P) and pWX97 (CPY-abcd-C351P) were generated by site directed mutagenesis with pWX92 and pWX93 as templates, respectively, using the WXN96 primer to convert Cys351 to Pro351.

pWX113 (CPY-ABCD-S194K). A 1.4 kb fragment was amplified from pKK92 using WXN101 and kinased WXN113R primers, digested with *NotI* and purified. In parallel, a 1.5 kb fragment was amplified from pKK92 using primers WXN102 and kinased WXN113F, digested with *XhoI*

and purified. The fragments were inserted into pRS316 digested with *NotI* and *XhoI* to create pWX113.

pWX114 (CPY-ABCD-G227R), pWX116 (CPY-ABCD-I451R) and pWX120 (CPY-abcD-I451R) were constructed as described for pWX113 using the primer sets [WXN114F/WXN114R; WXN101/WXN102], [WXN116F/WXN116R; WXN101/WXN102], and [WXN116F/WXN116R; WXN101/WXN102], respectively.

pWX140 (CPY-abcD). A 2.0 kb *NotI/BglII* fragment from pWX92 and a 0.8 kb *BglII/XhoI* fragment from pWX93 were ligated into pRS316 digested with *NotI* and *XhoI*.

pWX138 (CPY-abcD-S194K). Site-directed mutagenesis on pWX140 using the WXN138 primer was performed to convert Ser194 to Lys194.

pWX121 (CPY-ABCd-S194K). A 2.0 kb *NotI/BglII* fragment from pWX113 and a 0.8 kb *BglII/XhoI* fragment from pWX93 were ligated into pRS316 digested with *NotI* and *XhoI*.

pWX107 (CPY-abcD-C328P). A 2.0 kb *NotI/BglII* fragment from pWX95 and a 0.8 kb *BglII/XhoI* fragment from pWX94 were inserted into pRS316 digested with *NotI* and *XhoI*.

pWX108 (CPY-ABCd-C328P). A 2.0 kb *NotI/BglII* fragment from pWX94 and a 0.8 kb *BglII/XhoI* fragment from pWX95 were ligated into pRS316 digested with *NotI* and *XhoI*.

pWX109 (CPY-abcD-C351P). A 2.0 kb *NotI/BglII* fragment from pWX97 and a 0.8 kb *BglII/XhoI* fragment from pWX96 were ligated into pRS316 digested with *NotI* and *XhoI*.

pWX110 (CPY-ABCd-C351P). A 2.0 kb *NotI/BglII* fragment from pWX96 and a 0.8 kb *BglII/XhoI* fragment from pWX97 were ligated into pRS316 digested with *NotI* and *XhoI*.

pWX157 (PrA-AB-N88D) was generated by site directed mutagenesis using the WXN157 primer on the pKK247 template to convert Asn88 to Asp88.

pWX158 (PrA-AB-G199K) and pWX161 (PrA-ab-G199K) were generated by site directed mutagenesis with pKK247 and pWX130 as templates, respectively, using the WXN158 primer to convert Gly199 to Lys199.

pWX159 (PrA-AB-G233K) was generated by site directed mutagenesis using the WXN159 primer on the pKK247 template to convert Gly233 to Lys233.

pWX160 (PrA-AB-I365R) and pWX162 (PrA-ab-G199K) were generated by site directed mutagenesis with pKK247 and pWX130 as templates, respectively, using the WXN160 primer to convert Ile365 to Arg365.

pWX166 (PrA-Ab-G199K). A 1.7 kb *XhoI/NcoI* fragment from pWX158 and a 0.9 kb *NcoI/NotI* fragment from pWX161 were inserted into pRS315 digested with *NotI* and *XhoI*.

pWX167 (PrA-aB-G199K). A 1.7 kb *XhoI/NcoI* fragment from pWX161 and a 0.9 kb *NcoI/NotI* fragment from pWX158 were inserted into pRS315 digested with *NotI* and *XhoI*.

pWX168 (PrA-Ab-I365R). A 1.7 kb *XhoI/NcoI* fragment from pWX160 and a 0.9 kb *NcoI/NotI* fragment from pWX162 were inserted into pRS315 digested with *NotI* and *XhoI*.

pWX169 (PrA-aB-I365R). A 1.7 kb *XhoI/NcoI* fragment from pWX162 and a 0.9 kb *NcoI/NotI* fragment from pWX160 were inserted into pRS315 digested with *NotI* and *XhoI*.

## SUPPLEMENTARY TABLES

**Table S1. is in a separate file in MS Excel format.**

**Table S2. Strains used in this study**

| Strain | Genotype                                                                   | Source     |
|--------|----------------------------------------------------------------------------|------------|
| W303a  | <i>MATa, leu2-3, 112, his3-11, trp1-1, ura3-1, can1-100, ade2-1</i>        | P. Walter  |
| KKY62  | <i>MATa</i> , pKK129, W303 background                                      | This study |
| KKY126 | <i>MATa</i> , pKK156, W303 background                                      | This study |
| KKY127 | <i>MATa</i> , pKK157, W303 background                                      | This study |
| KKY128 | <i>MATa</i> , pKK158, W303 background                                      | This study |
| KKY129 | <i>MATa</i> , pKK159, W303 background                                      | This study |
| KKY130 | <i>MATa</i> , pKK160, W303 background                                      | This study |
| KKY131 | <i>MATa</i> , pKK161, W303 background                                      | This study |
| KKY132 | <i>MATa</i> , pKK162, W303 background                                      | This study |
| KKY133 | <i>MATa</i> , pKK163, W303 background                                      | This study |
| KKY134 | <i>MATa</i> , pKK164, W303 background                                      | This study |
| KKY201 | <i>MATa</i> , pKK216, W303 background                                      | This study |
| KKY202 | <i>MATa</i> , pJB113, W303 background                                      | This study |
| KKY203 | <i>MATa</i> , pJB114, W303 background                                      | This study |
| KKY204 | <i>MATa</i> , pKK218, W303 background                                      | This study |
| KKY273 | <i>MATa</i> , pKK228, W303 background                                      | This study |
| KKY206 | <i>MATa</i> , pKK210, W303 background                                      | This study |
| WXY3   | <i>MATa</i> , pWX2, W303 background                                        | This study |
| WXY183 | <i>MATa, hrd1::KANMX</i> , pWX2, W303 background                           | This study |
| WXY9   | <i>MATa, htm1::KANMX</i> , pWX2, W303 background                           | This study |
| WXY145 | <i>MATa</i> , pWX75, W303 background                                       | This study |
| WXY148 | <i>MATa, hrd1::KANMX</i> , pWX75, W303 background                          | This study |
| WXY260 | <i>MATa, htm1::KANMX</i> , pWX75, W303 background                          | This study |
| WXY206 | <i>MATa, cue1::TRP1, pep4::HIS3, prc1::KANMX</i> , pDN437, W303 background | This study |
| WXY207 | <i>MATa, cue1::TRP1, pep4::HIS3, prc1::KANMX</i> , pDN436, W303 background | This study |
| WXY208 | <i>MATa, cue1::TRP1, pep4::HIS3, prc1::KANMX</i> , pES132, W303 background | This study |
| WXY185 | <i>MATa, cue1::TRP1, pep4::HIS3, prc1::KANMX</i> , pWX87, W303 background  | This study |
| WXY263 | <i>MATa, cue1::TRP1, pep4::HIS3, prc1::KANMX</i> , pRS316, W303 background | This study |
| WXY264 | <i>MATa, cue1::TRP1, pep4::HIS3, prc1::KANMX</i> , pES57, W303 background  | This study |
| WXY265 | <i>MATa, cue1::TRP1, pep4::HIS3, prc1::KANMX</i> , pWX75, W303 background  | This study |
| WXY266 | <i>MATa</i> , pWX141, W303 background                                      | This study |
| WXY267 | <i>MATa</i> , pWX142, W303 background                                      | This study |
| WXY268 | <i>MATa</i> , pWX143, W303 background                                      | This study |
| WXY269 | <i>MATa</i> , pWX144, W303 background                                      | This study |
| WXY270 | <i>MATa</i> , pWX145, W303 background                                      | This study |
| WXY271 | <i>MATa</i> , pWX146, W303 background                                      | This study |
| WXY371 | <i>MATa</i> , pWX175, W303 background                                      | This study |
| WXY374 | <i>MATa</i> , pWX176, W303 background                                      | This study |
| WXY377 | <i>MATa</i> , pWX177, W303 background                                      | This study |
| WXY380 | <i>MATa</i> , pWX178, W303 background                                      | This study |
| WXY315 | <i>MATa</i> , pWX163, W303 background                                      | This study |
| WXY316 | <i>MATa</i> , pWX164, W303 background                                      | This study |
| WXY372 | <i>MATa, htm1::KANMX</i> , pWX175, W303 background                         | This study |
| WXY375 | <i>MATa, htm1::KANMX</i> , pWX176, W303 background                         | This study |
| WXY378 | <i>MATa, htm1::KANMX</i> , pWX177, W303 background                         | This study |
| WXY381 | <i>MATa, htm1::KANMX</i> , pWX178, W303 background                         | This study |
| WXY317 | <i>MATa, htm1::KANMX</i> , pWX163, W303 background                         | This study |
| WXY318 | <i>MATa, htm1::KANMX</i> , pWX164, W303 background                         | This study |



|        |                                                    |            |
|--------|----------------------------------------------------|------------|
| WXY373 | <i>MATa, hrd1::KANMX</i> , pWX175, W303 background | This study |
| WXY376 | <i>MATa, hrd1::KANMX</i> , pWX176, W303 background | This study |
| WXY379 | <i>MATa, hrd1::KANMX</i> , pWX177, W303 background | This study |
| WXY382 | <i>MATa, hrd1::KANMX</i> , pWX178, W303 background | This study |
| WXY319 | <i>MATa, hrd1::KANMX</i> , pWX163, W303 background | This study |
| WXY320 | <i>MATa, hrd1::KANMX</i> , pWX164, W303 background | This study |
| WXY322 | <i>MATa, htm1::KANMX</i> , pWX165, W303 background | This study |
| WXY323 | <i>MATa, hrd1::KANMX</i> , pWX165, W303 background | This study |
| WXY196 | <i>MATa</i> , pWX99, W303 background               | This study |
| WXY197 | <i>MATa</i> , pWX100, W303 background              | This study |
| WXY198 | <i>MATa</i> , pWX101, W303 background              | This study |
| WXY199 | <i>MATa</i> , pWX102, W303 background              | This study |
| WXY200 | <i>MATa</i> , pWX103, W303 background              | This study |
| KKY631 | <i>MATa, htm1::KANMX</i> , pWX99, W303 background  | This study |
| KKY632 | <i>MATa, htm1::KANMX</i> , pWX100, W303 background | This study |
| KKY633 | <i>MATa, htm1::KANMX</i> , pJB114, W303 background | This study |
| KKY634 | <i>MATa, htm1::KANMX</i> , pWX101, W303 background | This study |
| KKY635 | <i>MATa, htm1::KANMX</i> , pWX102, W303 background | This study |
| KKY636 | <i>MATa, htm1::KANMX</i> , pWX103, W303 background | This study |
| WXY201 | <i>MATa, hrd1::KANMX</i> , pWX99, W303 background  | This study |
| WXY202 | <i>MATa, hrd1::KANMX</i> , pWX100, W303 background | This study |
| KKY613 | <i>MATa, hrd1::KANMX</i> , pJB114, W303 background | This study |
| WXY203 | <i>MATa, hrd1::KANMX</i> , pWX101, W303 background | This study |
| WXY204 | <i>MATa, hrd1::KANMX</i> , pWX102, W303 background | This study |
| WXY205 | <i>MATa, hrd1::KANMX</i> , pWX103, W303 background | This study |
| WXY220 | <i>MATa</i> , pWX113, W303 background              | This study |
| WXY221 | <i>MATa</i> , pWX114, W303 background              | This study |
| WXY222 | <i>MATa</i> , pWX115, W303 background              | This study |
| WXY223 | <i>MATa</i> , pWX116, W303 background              | This study |
| WXY192 | <i>MATa, prcl::KANMX</i> , pWX94, W303 background  | This study |
| WXY193 | <i>MATa, prcl::KANMX</i> , pWX96, W303 background  | This study |
| WXY295 | <i>MATa, prcl::KANMX</i> , pWX114, W303 background | This study |
| WXY296 | <i>MATa, prcl::KANMX</i> , pWX116, W303 background | This study |
| WXY294 | <i>MATa, prcl::KANMX</i> , pWX140, W303 background | This study |
| WXY224 | <i>MATa</i> , pWX107, W303 background              | This study |
| WXY225 | <i>MATa</i> , pWX108, W303 background              | This study |
| WXY226 | <i>MATa</i> , pWX109, W303 background              | This study |
| WXY227 | <i>MATa</i> , pWX110, W303 background              | This study |
| WXY228 | <i>MATa, hrd1::KANMX</i> , pWX107, W303 background | This study |
| WXY229 | <i>MATa, hrd1::KANMX</i> , pWX108, W303 background | This study |
| WXY230 | <i>MATa, hrd1::KANMX</i> , pWX109, W303 background | This study |
| WXY231 | <i>MATa, hrd1::KANMX</i> , pWX110, W303 background | This study |
| WXY232 | <i>MATa</i> , pWX121, W303 background              | This study |
| WXY233 | <i>MATa</i> , pWX138, W303 background              | This study |
| WXY236 | <i>MATa, hrd1::KANMX</i> , pWX121, W303 background | This study |
| WXY237 | <i>MATa, hrd1::KANMX</i> , pWX138, W303 background | This study |
| WXY299 | <i>MATa</i> , pWX157, W303 background              | This study |
| WXY300 | <i>MATa</i> , pWX158, W303 background              | This study |
| WXY301 | <i>MATa</i> , pWX159, W303 background              | This study |
| WXY302 | <i>MATa</i> , pWX160, W303 background              | This study |
| WXY303 | <i>MATa</i> , pWX166, W303 background              | This study |
| WXY304 | <i>MATa</i> , pWX167, W303 background              | This study |
| WXY305 | <i>MATa</i> , pWX168, W303 background              | This study |
| WXY306 | <i>MATa</i> , pWX169, W303 background              | This study |
| WXY307 | <i>MATa, htm1::KANMX</i> , pWX166, W303 background | This study |
| WXY308 | <i>MATa, htm1::KANMX</i> , pWX167, W303 background | This study |

|        |                                                                |                    |
|--------|----------------------------------------------------------------|--------------------|
| WXY309 | <i>MATa, htm1::KANMX</i> , pWX168, W303 background             | This study         |
| WXY310 | <i>MATa, htm1::KANMX</i> , pWX169, W303 background             | This study         |
| WXY311 | <i>MATa, hrd1::KANMX</i> , pWX166, W303 background             | This study         |
| WXY312 | <i>MATa, hrd1::KANMX</i> , pWX167, W303 background             | This study         |
| WXY313 | <i>MATa, hrd1::KANMX</i> , pWX168, W303 background             | This study         |
| WXY314 | <i>MATa, hrd1::KANMX</i> , pWX169, W303 background             | This study         |
| WXY368 | <i>MATa, alg3::HIS3</i> , W303 background                      | This study         |
| ESY676 | <i>MATa</i> , pES147, W303 background                          | Spear et al., 2005 |
| ESY677 | <i>MATa, htm1::KANMX</i> , pES147, W303 background             | Spear et al., 2005 |
| WXY383 | <i>MATa, alg3::HIS3</i> , pES147, W303 background              | This study         |
| WXY384 | <i>MATa, alg3::HIS3, htm1::KANMX</i> , pES147, W303 background | This study         |
| WXY400 | <i>MATa</i> , pES149, W303 background                          | This study         |
| WXY401 | <i>MATa, htm1::KANMX</i> , pES149, W303 background             | This study         |
| WXY402 | <i>MATa, alg3::HIS3</i> , pES149, W303 background              | This study         |
| WXY403 | <i>MATa, alg3::HIS3, htm1::KANMX</i> , pES149, W303 background | This study         |

**Table S3. Oligonucleotide primers used in this study**

| Primer | Construct          | Sequence (5' -> 3')                              |
|--------|--------------------|--------------------------------------------------|
| KKN129 | PrA*-Ab-Δ37-71     | ATAAACACGAGTTGTCCGATGATACTGGTTCTTCAAACCT         |
| KKN130 | PrA*-Ab-Δ72-106    | AAAACCTCAAGGTTATTTGAATGGTACTGAATTTGCCAT          |
| KKN131 | PrA*-Ab-Δ110-146   | GCTACAAAAGCTAATGGTACTGAGCCGGGCTTAACATTTGC        |
| KKN132 | PrA*-Ab-Δ147-183   | ACTTCGCTGAGGCTACCAGCGATTTGTTGGACGAAAAGAG         |
| KKN133 | PrA*-Ab-Δ184-220   | TTTACAACGCCATTCAACAAGATATCACTTGGTTACCTGT         |
| KKN134 | PrA*-Ab-Δ221-257   | ACGAGTCTAAGTTCAAGGGCACTGGTACTTCTTTGATTAC         |
| KKN135 | PrA*-Ab-Δ258-294   | GCCATGGTGCCGCCATCGATGACAATCTACCTGATCTAAT         |
| KKN136 | PrA*-Ab-Δ295-331   | CTCTAGACTGTAACACCAGAGATTTCCCAGAACCTGTTGG         |
| KKN137 | PrA*-Ab-Δ332-368   | TCTCTGCAATTACACCAATGTACCCATATGATGTTCCAGA         |
| JBN159 | CPY*-abcD-Δ25-117  | CTAAGGCCATCTCATTGCAAATCCTGGGCATTGACCCACAG        |
| JBN160 | CPY*-abcD-Δ116-206 | GTGTCAACAAGATTAAGGACCCTGTCAACGTTGGGTTCTC         |
| JBN161 | CPY*-abcD-Δ207-297 | CCGTGATCTTCCTTGACCAGTATTACGAACCAATGGCCTG         |
| JBN162 | CPY*-abcD-Δ298-388 | GACCCATTGACTCAGTATAACTACTTAAACCAGGACTACGTC       |
| KKN195 | CPY*-abcD-Δ389-476 | CGTTACAAGATATCGACGACGTACGTAACCTGGACTGCTTC        |
| N572   | CPY*-abcD-Δ482-532 | AGTCCAGTTACGTACTTT                               |
| N573   | CPY*-abcD-Δ482-532 | TACCCATATGATGTTCCA                               |
| WXN2   | PrA*-Δ155-405      | AATTTGCCATTCAATATGGTACTTACCCATATGATGTTCCAGATTACG |
| WXN75  | CPYΔ2              | CTGTCCACTACACTCGCTAAGGCCATCAGGAAGGATTGTGAAGGTGGC |

|        |                                                                                                                                                                                           |                                                                                       |
|--------|-------------------------------------------------------------------------------------------------------------------------------------------------------------------------------------------|---------------------------------------------------------------------------------------|
| WXN92  | CPY-ABCD<br>CPY-abcd                                                                                                                                                                      | 5'-CACCGCGGTGGCGGCCGCTCTAGAGCTGAGGCTAC<br>CAGCGAGCCGGGCTTATTAGGTCTCTTATGGTAGTTTTTA-3' |
| WXN93  | CPY-ABCD<br>CPY-abcd                                                                                                                                                                      | GCCTTAAGTATGGTTAACGAATGGATTACGGTGGTTTCTCCTTATACCCA                                    |
| WXN141 | CPY-Δ112-123<br>CPY*-Abcd-Δ112-123                                                                                                                                                        | GAAAACATATCAGCTTCGTGTCAACAATGTCACACAGTACACGGGTAC                                      |
| WXN142 | CPY-Δ127-138<br>CPY*-Abcd-Δ127-138                                                                                                                                                        | CTGGGCATTGACCCAAATGTCACAAAGCATTCTCTTTTGGACTTTT                                        |
| WXN143 | CPY-Δ185-196<br>CPY*-aBcd-Δ185-196                                                                                                                                                        | TTAGGACCCATCCATTGGACCTAGCAATGCCACCGTGATCTTCCTT                                        |
| WXN144 | CPY-Δ201-212<br>CPY*-aBcd-Δ201-212                                                                                                                                                        | TACTCTTGGAACAGCAATGCCACCTCGTATTCCGGGTCCTCAGGTGTT                                      |
| WXN145 | CPY-Δ267-278<br>CPY*-abCd-Δ267-278                                                                                                                                                        | GCCGGCCATTACATCCCTGTTTTTAACTTAACCTCCGTCTTGATCGGA                                      |
| WXN146 | CPY-Δ282-293<br>CPY*-abCd-Δ282-293                                                                                                                                                        | AAGGACAGAACTTCAACTTAACCACTCAGTATAACTATTACGAACCA                                       |
| WXN22  | CPY*-abcB                                                                                                                                                                                 | ATCGTAAACGTTTCTGCCGGTACG                                                              |
| WXN23  | CPY*-abcB                                                                                                                                                                                 | ATCAAAACGAAGAAAGACTGGGAC                                                              |
| WXN24  | CPY*-abcB                                                                                                                                                                                 | 5'-CCCCCTCTAGATTAAGCGTAATCTGGAACATCA<br>TATGGGTAGAAATCTTGGCCCTTGTGACGTA-3'            |
| WXN165 | CPY*-abcB-Δ482-534                                                                                                                                                                        | AACCCTTACTCTTGGAACAGCAATGCCACCTACCCATATGATGTTCCAGAT                                   |
| WXN99  | CPY-abcD-Δ25-117<br>CPY-abcD-Δ116-206<br>CPY-abcD-Δ298-388<br>CPY-abcD-Δ389-476<br>CPY-abcD-Δ482-532                                                                                      | GGGGAATCCTACGCCGGCCATTACATC                                                           |
| WXN100 | CPY-abcD-Δ25-117<br>CPY-abcD-Δ116-206<br>CPY-abcD-Δ298-388<br>CPY-abcD-Δ389-476<br>CPY-abcD-Δ482-532                                                                                      | AGCGATGTGGAAATCTTGGCCCTT                                                              |
| WXN101 | CPY-abcD-Δ25-117<br>CPY-abcD-Δ116-206<br>CPY-abcD-Δ298-388<br>CPY-abcD-Δ389-476<br>CPY-abcD-Δ482-532<br>CPY*-abcB<br>CPY-ABCD-S194K<br>CPY-ABCD-G227R<br>CPY-ABCD-I451R<br>CPY-abcd-I451R | GGGGATGTGCTGCAAGGCGATTAA                                                              |
| WXN102 | CPY-abcD-Δ25-117                                                                                                                                                                          | ACACAGGAAACAGCTATGACCATG                                                              |

|         |                   |                                                      |
|---------|-------------------|------------------------------------------------------|
|         | CPY-abcD-Δ116-206 |                                                      |
|         | CPY-abcD-Δ298-388 |                                                      |
|         | CPY-abcD-Δ389-476 |                                                      |
|         | CPY-abcD-Δ482-532 |                                                      |
|         | CPY-ABCD-S194K    |                                                      |
|         | CPY-ABCD-G227R    |                                                      |
|         | CPY-ABCD-I451R    |                                                      |
|         | CPY-abcd-I451R    |                                                      |
| WXN94   | CPY-ABCD-C328P    | GCTATGGAAGACTCTTTGGAACGTCCTTTGGGCTTGATCGAGTCGTGCTAT  |
|         | CPY-abcd-C328P    |                                                      |
| WXN96   | CPY-ABCD-C351P    | TCCTGTGTTCCAGCTACCATTATCCTAATAACGCCAATTGGCTCCTTAC    |
|         | CPY-abcd-C351P    |                                                      |
| WXN113F | CPY-ABCD-S194K    | AAGTGG AACAGCAATGCCACCGTGATC                         |
| WXN113R | CPY-ABCD-S194K    | GTAAGGGTTCCCGATGGGTTTCAA                             |
| WXN114F | CPY-ABCD-G227R    | AGGAAGGATGTCTATAACTTCTTGGAG                          |
| WXN114R | CPY-ABCD-G227R    | AGCGGCGACAGTGTTGGAAACACC                             |
| WXN116F | CPY-ABCD-I451R    | AGGTGTA ACTGGTTGGGTAATAAGGCG                         |
|         | CPY-abcd-I451R    |                                                      |
| WXN116R | CPY-ABCD-I451R    | GAAATCTTTATCGCCTGCATATAC                             |
|         | CPY-abcd-I451R    |                                                      |
| WXN138  | CPY-abcD-S194K    | GGGAACCCTTACAAGTGG AACAGCCAGGCCACCGTGATCTTCCTTGACCAG |
| KKN274  | PrA-AB            | GCCTATCGATTGCAATCACAAATTGATCCTAGTAAGAAG              |
| KKN275  | PrA-AB            | GGAGCCTGAAACTTCAAGCGTGTAATCGTA                       |
| WXN157  | PrA-AB-N88D       | GATGTTCCATTGACAAAATTACTTGGACGCACAATATTACACTGACATTACT |
| WXN158  | PrA-AB-G199K      | TTTGGCAAGTTCGATGGTATTTTGAAGTTGGGTACGATACCATTCTGT     |
|         | PrA-ab-G199K      |                                                      |
| WXN159  | PrA-AB-G233K      | GAAAAGAGATTGCTTTTATTTGAAGGACACTTCAAAGGATACTGAAAAT    |
| WXN160  | PrA-AB-I365R      | GTTTCAGGCTCCTGTATCTCTGCACGTACACCAATGGATTTC CAGAACCT  |
|         | PrA-ab-I365R      |                                                      |

## FIGURE AND TABLE LEGENDS TO SUPPLEMENTARY DATA

**Figure S1. Intracellular processing of CPY and PrA point mutants.** CPY and PrA fully glycosylated variants were analyzed by metabolic pulse-chase (10 min pulse) followed by immunoprecipitation and separation by SDS-PAGE. Although all variants carry C-terminal HA tags, it was necessary to express CPY variants in strains deleted of PRC1 (encodes CPY) and use anti-CPY antisera to visualize all recombinant forms because the CPY HA tag is proteolytically removed in the vacuole. (A and B) CPY variants. The positions of ER (p1), Golgi (p2), and mature vacuolar (m) forms are indicated. (C and D) PrA variants. The positions of ER (p1),

Golgi (p2), and mature vacuolar (m) forms are indicated. (A) *Aprc1* knockout cells expressing CPY-ABCD-G227R or CPY-ABCD-I451R. (B) Wild type cells expressing PrA-AB-N88D or PrA-AB-G233K. (C) Wild type cells expressing CPY-ABCD, CPY\* or CPY-ABCD-S194K, and *Aprc1* knockout cells expressing CPY-ABCD-C328P or CPY-ABCD-C351P. (D) Wild type cells expressing PrA-AB-G199K or PrA-AB-I365R.

**Table S1. Peptide analysis of CPY $\Delta$ 2-associated protein.** The peptide sequences of Kar2p identified by mass spectrometry are summarized. Peptide position indicates the start and end point of the identified peptide within the sequence of Kar2p with the translation initiator methionine as position 1.  $M_r$  (expt) is the experimentally determined mass, and  $M_r$  (calc) is the calculated mass of the peptide. Delta represents the observed mass versus delta error. Miss indicates the number of missed trypsin cleavage sites, and the peptides identified column lists the actual sequence of the identified peptide. The ions score is  $-10 \cdot \log(P)$ , where P is the probability that the observed match is a random event. Protein matches to NCBI nr gi|6322426, *Saccharomyces cerevisiae* Kar2p. Nominal mass ( $M_r$ ): 74480. Sequence coverage is 17%.

## REFERENCES TO SUPPLEMENTARY MATERIALS

Sambrook, J., Fritsch, E. M., and Maniatis, T. (1989). *Molecular Cloning: a laboratory manual*, 2nd edn (Plainview, Cold Spring Harbor Laboratory Press).

Sikorski, R. S., and Hieter, P. (1989). A system of shuttle vectors and yeast host strains designed for efficient manipulation of DNA in *Saccharomyces cerevisiae*. *Genetics* *122*, 19-27.

Spear, E. D., and Ng, D. T. (2005). Single, context-specific glycans can target misfolded glycoproteins for ER-associated degradation. *J Cell Biol* *169*, 73-82.

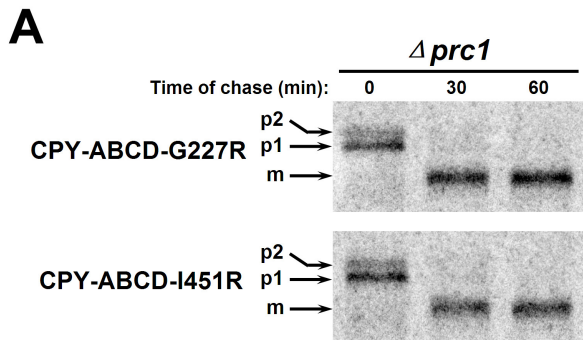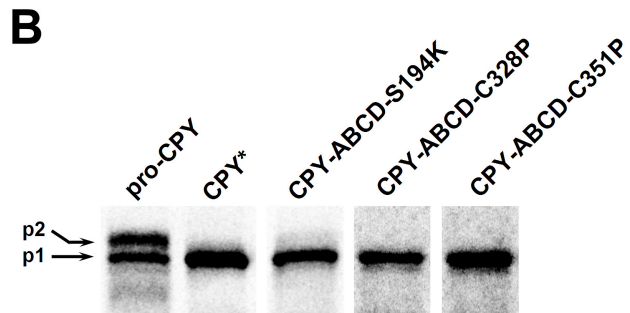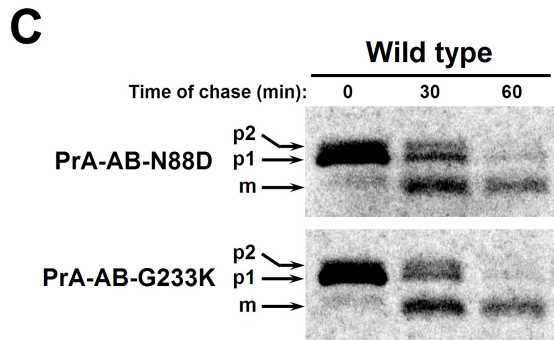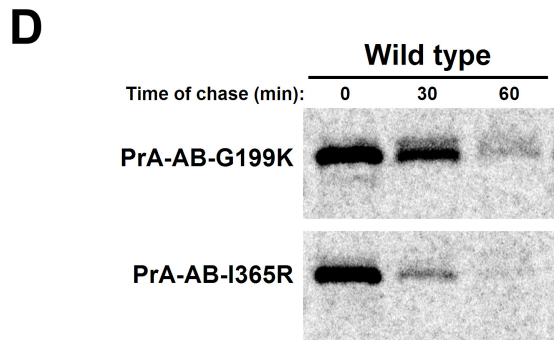

Supplement: E09-03-0231_1.pdf [file E09-03-0231_1.pdf]
